# Supplementary material for: Occupational exposure of healthcare and research staff to static magnetic stray fields from 1.5–7 Tesla MRI scanners is associated with reporting of transient symptoms
Source: PubMed Central journal article supplement — Occup Environ Med. 2014 Apr 8;71(6):423–9. doi: 10.1136/oemed-2013-101890 (PMC4033112; doi:10.1136/oemed-2013-101890), 2014-04-08
Supplement: oemed-2013-101890-s1.pdf [file oemed-2013-101890-s1.pdf]

**FORM 1 – TO BE FILLED IN AT THE START OF YOUR WORK**

Time (hh:mm) [\_\_:\_\_]

**1. Do you experience any of the symptoms (listed in the table below) at this moment (so before you started your work at the scanner)?**

- No → Please continue to question 3
- Yes → Please indicate in the table which symptoms you are presently experiencing

|                                                             | Symptoms that you experienced |
|-------------------------------------------------------------|-------------------------------|
| - Tinnitus or sensation of head ringing                     | <input type="radio"/>         |
| - Earache                                                   | <input type="radio"/>         |
| - Headache                                                  | <input type="radio"/>         |
| - Concentration problems                                    | <input type="radio"/>         |
| - Tiredness or sleepiness                                   | <input type="radio"/>         |
| - Nausea                                                    | <input type="radio"/>         |
| - Vomiting                                                  | <input type="radio"/>         |
| - Involuntary muscle contractions                           | <input type="radio"/>         |
| - Palpitation                                               | <input type="radio"/>         |
| - Tingling sensation in the body, please specify body part: | <input type="radio"/>         |
| - Sensation of glowing, burning or irritated skin           | <input type="radio"/>         |
| - Suddenly feeling warm or hot, hot flashes                 | <input type="radio"/>         |
| - Itchy, watery or red eyes                                 | <input type="radio"/>         |
| - Seeing black spots or having a temporary loss of vision   | <input type="radio"/>         |
| - Seeing light spots or light flashes                       | <input type="radio"/>         |
| - Blurred or double vision                                  | <input type="radio"/>         |
| - Sensation of dizziness or vertigo                         | <input type="radio"/>         |
| - Feeling lightheaded or weightless                         | <input type="radio"/>         |
| - Feeling of instability when standing, walking or moving   | <input type="radio"/>         |
| - A metallic taste                                          | <input type="radio"/>         |
| - A strange smell sensation                                 | <input type="radio"/>         |
| - Other, please specify:                                    | <input type="radio"/>         |

**2. Do you have any idea what caused these symptoms?**

---



---



---

**3. How many alcoholic consumptions did you consume during the past 24 hours?**

Please report the number of glasses. (NB: one serving glass of wine, beer or spirit equals 1 glass; a bottle of beer equals 1,5 glasses)

\_\_\_ glasses

**4. Comments**

---



---



---

**FORM 2 – TO BE FILLED IN AT THE END OF YOUR WORK**

Time (hh:mm) [\_\_:\_\_]

**1.a Did you enter the MRI scanner room (i.e. the room in which the scanner is placed)?**

- No → Please continue to question 3
- Yes

**1.b At which scanner(s) did you work during this shift? Please report scanner name/number (e.g. “MRI 2”) and field (in Tesla).**

.....

**2. How many times were you in the scanner room during image acquisition?\***

Count the total number of *times*, not the number of procedures!

\*Acquisition: The moment when the image is acquired; when the scan is being performed.

\_\_\_ times

**3. Did you use any disinfectants (e.g. alcohol) during your work day?**

- No
- Yes

**4. Did you use any cleaning agents during your work day?**

- No
- Yes → Please specify which type of cleaning agents:

- Cleaning agents that have a strong chemical smell or vapour, such as products containing bleach or volatile compounds)
- Cleaning agents that do *not* have a strong chemical smell or vapour, such as products made of soap (hand soap, detergent)

**5. How do you consider the workload during this work day?**

- Light
- Moderate
- Heavy

**6. How tiring do you consider this work day to have been?**

- Hardly tiring
- A little tiring
- Very tiring

**7. Did you experience any of the symptoms (listed in the table below) during your work shift?**

- No → Please continue to question 10
- Yes → Please indicate which symptoms you have experienced and their approximate duration

|                                                             | Symptoms that you experienced | Duration (minutes): |                       |                       |                       |                       |                       |
|-------------------------------------------------------------|-------------------------------|---------------------|-----------------------|-----------------------|-----------------------|-----------------------|-----------------------|
|                                                             |                               |                     | < 1                   | < 5                   | < 15                  | < 60                  | > 60                  |
| - Tinnitus or sensation of head ringing                     | <input type="radio"/>         | →                   | <input type="radio"/> |
| - Earache                                                   | <input type="radio"/>         | →                   | <input type="radio"/> |
| - Headache                                                  | <input type="radio"/>         | →                   | <input type="radio"/> |
| - Concentration problems                                    | <input type="radio"/>         | →                   | <input type="radio"/> |
| - Tiredness or sleepiness                                   | <input type="radio"/>         | →                   | <input type="radio"/> |
| - Nausea                                                    | <input type="radio"/>         | →                   | <input type="radio"/> |
| - Vomiting                                                  | <input type="radio"/>         | →                   | <input type="radio"/> |
| - Involuntary muscle contractions                           | <input type="radio"/>         | →                   | <input type="radio"/> |
| - Palpitation                                               | <input type="radio"/>         | →                   | <input type="radio"/> |
| - Tingling sensation in the body, please specify body part: | <input type="radio"/>         | →                   | <input type="radio"/> |
| - Sensation of glowing, burning or irritated skin           | <input type="radio"/>         | →                   | <input type="radio"/> |
| - Suddenly feeling warm/hot, hot flashes                    | <input type="radio"/>         | →                   | <input type="radio"/> |
| - Itchy, watery or red eyes                                 | <input type="radio"/>         | →                   | <input type="radio"/> |
| - Seeing black spots or having a temporary loss of vision   | <input type="radio"/>         | →                   | <input type="radio"/> |
| - Seeing light spots or light flashes                       | <input type="radio"/>         | →                   | <input type="radio"/> |
| - Blurred or double vision                                  | <input type="radio"/>         | →                   | <input type="radio"/> |
| - Sensation of dizziness or vertigo                         | <input type="radio"/>         | →                   | <input type="radio"/> |
| - Feeling lightheaded or weightless                         | <input type="radio"/>         | →                   | <input type="radio"/> |
| - Feeling of instability when standing, walking or moving   | <input type="radio"/>         | →                   | <input type="radio"/> |
| - A metallic taste                                          | <input type="radio"/>         | →                   | <input type="radio"/> |
| - A strange smell sensation                                 | <input type="radio"/>         | →                   | <input type="radio"/> |
| - Other, please specify:                                    | <input type="radio"/>         | →                   | <input type="radio"/> |

8. Do you have any idea what caused these symptoms?

---



---



---

9. Did you feel that one or more of these symptoms hampered/affected your work activities in some way?

- No
- Yes → By which of the above listed symptoms was your work affected and in what manner?

---



---



---

10. Comments

---



---



---
