# Supplementary material for: Occupational exposure of healthcare and research staff to static magnetic stray fields from 1.5–7 Tesla MRI scanners is associated with reporting of transient symptoms
Source: PubMed Central journal article supplement — Occup Environ Med. 2014 Apr 8;71(6):423–9. doi: 10.1136/oemed-2013-101890 (PMC4033112; doi:10.1136/oemed-2013-101890), 2014-04-08
Supplement: oemed-2013-101890-s2.pdf [file oemed-2013-101890-s2.pdf]

# Occupational exposure to static magnetic fields from MRI scanners

## Questionnaire

1. What is your date of birth?                    \_\_ / \_\_ / \_\_\_\_ (dd/mm/yyyy)

2. What is your gender?                         Female  
                                                           Male

3. What is your height?                        \_\_\_\_ cm

4. What is your current job title or function?

- Scientific researcher
- Student performing research
- Clinical or medical physicist
- Laboratory assistant / technician
- (Medical) technician or maintenance staff
- MRI radiographer
- Other, being: \_\_\_\_\_

5. On how many days per month (i.e. 4 weeks) on average do you work near an MRI scanner, which requires you to enter the scanner room (i.e. the room in which the scanner is located)?

\_\_\_\_\_ days per month

Continue on next page ----->

**6. Within the last year (i.e. 12 months), on how many days did you work near an MRI scanner, which required you to enter the scanner room?**

\_\_\_\_\_ days

**7.a When did you first start to work with MRI, or did your job require you to work inside a room that holds an MRI scanner? (This can refer to either your current or a previous workplace)**

From [ ]-[ ]-[ ]-[ ]-[ ]-[ ] (mm-yyyy)

**7.b Has this period been interrupted in the mean time, with periods when you did not work with MRI?**

No

Yes → How long has this period been interrupted in total? (add all interruption periods)

[ ] years and [ ] months

→ When did the most recent interruption take place?

From [ ]-[ ]-[ ]-[ ]-[ ]-[ ] (mm-yyyy) to [ ]-[ ]-[ ]-[ ]-[ ]-[ ] (mm-yyyy)

Thank you very much for completing this questionnaire
