# Supplementary material for: Occupational exposure of healthcare and research staff to static magnetic stray fields from 1.5–7 Tesla MRI scanners is associated with reporting of transient symptoms
Source: PubMed Central journal article supplement — Occup Environ Med. 2014 Apr 8;71(6):423–9. doi: 10.1136/oemed-2013-101890 (PMC4033112; doi:10.1136/oemed-2013-101890), 2014-04-08
Supplement: oemed-2013-101890-s3.pdf [file oemed-2013-101890-s3.pdf]

eTable S1. Reported symptoms by exposure condition<sup>a</sup>

|                                              | Unexposed to SMF<br>N <sub>obs</sub> = 134 |         |                   | Exposed to SMF<br>N <sub>obs</sub> = 499 |         |                   | Total<br>N <sub>obs</sub> = 633 |         |                   |         |
|----------------------------------------------|--------------------------------------------|---------|-------------------|------------------------------------------|---------|-------------------|---------------------------------|---------|-------------------|---------|
|                                              | N <sub>obs</sub>                           | (%)     | N <sub>subj</sub> | N <sub>obs</sub>                         | (%)     | N <sub>subj</sub> | N <sub>obs</sub>                | (%)     | N <sub>subj</sub> | (%)     |
| <b>Any symptom within specified category</b> |                                            |         |                   |                                          |         |                   |                                 |         |                   |         |
| SMF target symptoms                          | 25                                         | (18.7%) | 25                | 141                                      | (28.3%) | 102               | 166                             | (26.2%) | 124               | (37.5%) |
| SMF target - core symptoms                   | 1                                          | (0.8%)  | 1                 | 38                                       | (7.6%)  | 31                | 39                              | (6.2%)  | 31                | (9.4%)  |
| SGF target symptoms                          | 0                                          | (0.0%)  | 0                 | 2                                        | (0.4%)  | 2                 | 2                               | (0.3%)  | 2                 | (0.6%)  |
| A priori unrelated symptoms                  | 4                                          | (3.0%)  | 4                 | 29                                       | (5.8%)  | 19                | 33                              | (5.2%)  | 22                | (6.6%)  |
| Any symptoms                                 | 28                                         | (20.9%) | 28                | 147                                      | (29.5%) | 105               | 175                             | (27.7%) | 130               | (39.3%) |
| <b>Specific symptom</b>                      |                                            |         |                   |                                          |         |                   |                                 |         |                   |         |
| Vertigo <sup>b</sup>                         | 0                                          | (0.0%)  | 0                 | 28                                       | (5.6%)  | 23                | 28                              | (4.4%)  | 23                | (6.9%)  |
| Nausea <sup>b</sup>                          | 0                                          | (0.0%)  | 0                 | 6                                        | (1.2%)  | 6                 | 6                               | (1.0%)  | 6                 | (1.8%)  |
| Head ringing <sup>b</sup>                    | 0                                          | (0.0%)  | 0                 | 5                                        | (1.0%)  | 3                 | 5                               | (0.8%)  | 3                 | (0.9%)  |
| Magnetophosphenes <sup>b</sup>               | 1                                          | (0.8%)  | 1                 | 2                                        | (0.4%)  | 2                 | 3                               | (0.5%)  | 3                 | (0.9%)  |
| Metallic taste <sup>b</sup>                  | 0                                          | (0.0%)  | 0                 | 9                                        | (1.8%)  | 9                 | 9                               | (1.4%)  | 9                 | (2.7%)  |
| Headache <sup>c</sup>                        | 14                                         | (10.5%) | 14                | 57                                       | (11.4%) | 49                | 71                              | (11.2%) | 62                | (18.7%) |
| Tiredness <sup>c</sup>                       | 12                                         | (9.0%)  | 12                | 63                                       | (12.6%) | 47                | 75                              | (11.9%) | 58                | (17.5%) |
| Concentration problems <sup>c</sup>          | 3                                          | (2.2%)  | 3                 | 16                                       | (3.2%)  | 14                | 19                              | (3.0%)  | 17                | (5.1%)  |
| Vomiting <sup>c</sup>                        | 0                                          | (0.0%)  | 0                 | 0                                        | (0.0%)  | 0                 | 0                               | (0.0%)  | 0                 | (0.0%)  |
| Instability <sup>c</sup>                     | 0                                          | (0.0%)  | 0                 | 7                                        | (1.4%)  | 6                 | 7                               | (1.1%)  | 6                 | (1.8%)  |
| Lightheadedness <sup>c</sup>                 | 2                                          | (1.5%)  | 2                 | 19                                       | (3.8%)  | 17                | 21                              | (3.3%)  | 19                | (5.7%)  |
| Blurred vision <sup>c</sup>                  | 1                                          | (0.8%)  | 1                 | 2                                        | (0.4%)  | 2                 | 3                               | (0.5%)  | 3                 | (0.9%)  |
| Strange smell <sup>c</sup>                   | 1                                          | (0.8%)  | 1                 | 0                                        | (0.0%)  | 0                 | 1                               | (0.2%)  | 1                 | (0.3%)  |
| Tingling <sup>d</sup>                        | 0                                          | (0.0%)  | 0                 | 2                                        | (0.4%)  | 2                 | 2                               | (0.3%)  | 2                 | (0.6%)  |
| Muscle contractions <sup>d</sup>             | 0                                          | (0.0%)  | 0                 | 0                                        | (0.0%)  | 0                 | 0                               | (0.0%)  | 0                 | (0.0%)  |
| Black spots <sup>e</sup>                     | 0                                          | (0.0%)  | 0                 | 2                                        | (0.4%)  | 1                 | 2                               | (0.3%)  | 1                 | (0.3%)  |
| Irritated eyes <sup>e</sup>                  | 1                                          | (0.8%)  | 1                 | 10                                       | (2.0%)  | 7                 | 11                              | (1.7%)  | 8                 | (2.4%)  |
| Irritated skin <sup>e</sup>                  | 1                                          | (0.8%)  | 1                 | 4                                        | (0.8%)  | 3                 | 5                               | (0.8%)  | 3                 | (0.9%)  |

|                          |   |        |   |   |        |   |   |        |   |        |
|--------------------------|---|--------|---|---|--------|---|---|--------|---|--------|
| Hot flashes <sup>e</sup> | 1 | (0.8%) | 1 | 7 | (1.4%) | 4 | 8 | (1.3%) | 4 | (1.2%) |
| Earache <sup>e</sup>     | 1 | (0.8%) | 1 | 3 | (0.6%) | 3 | 4 | (0.6%) | 4 | (1.2%) |
| Palpitation <sup>e</sup> | 1 | (0.8%) | 1 | 5 | (1.0%) | 3 | 6 | (1.0%) | 4 | (1.2%) |

N<sub>obs</sub> = number of observations; N<sub>subj</sub> = number of individual subjects.

<sup>a</sup> Results are based on an unbalanced study sampling design with repeated measures per subject.

<sup>b</sup> SMF target core symptom, <sup>c</sup> SMF target symptom, <sup>d</sup> SGF target symptom, <sup>e</sup> a priori unrelated symptom
