# Supplementary material for: Occupational exposure of healthcare and research staff to static magnetic stray fields from 1.5–7 Tesla MRI scanners is associated with reporting of transient symptoms
Source: PubMed Central journal article supplement — Occup Environ Med. 2014 Apr 8;71(6):423–9. doi: 10.1136/oemed-2013-101890 (PMC4033112; doi:10.1136/oemed-2013-101890), 2014-04-08
Supplement: oemed-2013-101890-s4.pdf [file oemed-2013-101890-s4.pdf]

eTable S2. Reported symptoms by scanner category<sup>a</sup>

|                                              | <b>Unexposed</b>             |            | <b>1.5T closed bore<sup>b</sup></b> |            | <b>3T closed bore<sup>c</sup></b> |            | <b>7T closed bore<sup>d</sup></b> |            | <b>&lt;1.5T various types<sup>e</sup></b> |            | <b>&gt;4.7T small bore<sup>f</sup></b> |            |
|----------------------------------------------|------------------------------|------------|-------------------------------------|------------|-----------------------------------|------------|-----------------------------------|------------|-------------------------------------------|------------|----------------------------------------|------------|
|                                              | <b>N<sub>obs</sub> = 134</b> |            | <b>N<sub>obs</sub> = 259</b>        |            | <b>N<sub>obs</sub> = 131</b>      |            | <b>N<sub>obs</sub> = 31</b>       |            | <b>N<sub>obs</sub> = 49</b>               |            | <b>N<sub>obs</sub> = 57</b>            |            |
|                                              | <b>N<sub>obs</sub></b>       | <b>(%)</b> | <b>N<sub>obs</sub></b>              | <b>(%)</b> | <b>N<sub>obs</sub></b>            | <b>(%)</b> | <b>N<sub>obs</sub></b>            | <b>(%)</b> | <b>N<sub>obs</sub></b>                    | <b>(%)</b> | <b>N<sub>obs</sub></b>                 | <b>(%)</b> |
| <b>Any symptom within specified category</b> |                              |            |                                     |            |                                   |            |                                   |            |                                           |            |                                        |            |
| SMF target symptoms                          | 25                           | (18.7%)    | 72                                  | (27.8%)    | 46                                | (35.1%)    | 12                                | (38.7%)    | 13                                        | (26.5%)    | 9                                      | (15.8%)    |
| SMF target - core symptoms                   | 1                            | (0.8%)     | 14                                  | (5.4%)     | 12                                | (9.2%)     | 9                                 | (29.0%)    | 2                                         | (4.1%)     | 0                                      | (0.0%)     |
| A priori unrelated symptoms                  | 4                            | (3.0%)     | 17                                  | (6.6%)     | 3                                 | (2.3%)     | 0                                 | (0.0%)     | 7                                         | (14.3%)    | 4                                      | (7.0%)     |
| <b>Specific symptom</b>                      |                              |            |                                     |            |                                   |            |                                   |            |                                           |            |                                        |            |
| Vertigo <sup>g</sup>                         | 0                            | (0.0%)     | 9                                   | (3.5%)     | 10                                | (7.6%)     | 7                                 | (22.6%)    | 1                                         | (2.0%)     | 0                                      | (0.0%)     |
| Nausea <sup>g</sup>                          | 0                            | (0.0%)     | 3                                   | (1.2%)     | 2                                 | (1.5%)     | 1                                 | (3.2%)     | 0                                         | (0.0%)     | 0                                      | (0.0%)     |
| Head ringing <sup>g</sup>                    | 0                            | (0.0%)     | 2                                   | (0.8%)     | 2                                 | (1.5%)     | 0                                 | (0.0%)     | 1                                         | (2.0%)     | 0                                      | (0.0%)     |
| Magnetophosphenes <sup>g</sup>               | 1                            | (0.8%)     | 1                                   | (0.4%)     | 1                                 | (0.8%)     | 0                                 | (0.0%)     | 0                                         | (0.0%)     | 0                                      | (0.0%)     |
| Metallic taste <sup>g</sup>                  | 0                            | (0.0%)     | 1                                   | (0.4%)     | 1                                 | (0.8%)     | 6                                 | (19.4%)    | 1                                         | (2.0%)     | 0                                      | (0.0%)     |
| Headache <sup>h</sup>                        | 14                           | (10.5%)    | 40                                  | (15.4%)    | 14                                | (10.7%)    | 4                                 | (12.9%)    | 2                                         | (4.1%)     | 3                                      | (5.3%)     |
| Tiredness <sup>h</sup>                       | 12                           | (9.0%)     | 33                                  | (12.7%)    | 20                                | (15.3%)    | 3                                 | (9.7%)     | 7                                         | (14.3%)    | 6                                      | (10.5%)    |
| Concentration problems <sup>h</sup>          | 3                            | (2.2%)     | 6                                   | (2.3%)     | 5                                 | (3.8%)     | 1                                 | (3.2%)     | 1                                         | (2.0%)     | 3                                      | (5.3%)     |
| Vomiting <sup>h</sup>                        | 0                            | (0.0%)     | 0                                   | (0.0%)     | 0                                 | (0.0%)     | 0                                 | (0.0%)     | 0                                         | (0.0%)     | 0                                      | (0.0%)     |
| Instability <sup>h</sup>                     | 0                            | (0.0%)     | 1                                   | (0.4%)     | 4                                 | (3.1%)     | 1                                 | (3.2%)     | 1                                         | (2.0%)     | 1                                      | (1.8%)     |
| Lightheadedness <sup>h</sup>                 | 2                            | (1.5%)     | 6                                   | (2.3%)     | 10                                | (7.6%)     | 1                                 | (3.2%)     | 3                                         | (6.1%)     | 1                                      | (1.8%)     |
| Blurred vision <sup>h</sup>                  | 1                            | (0.8%)     | 1                                   | (0.4%)     | 0                                 | (0.0%)     | 0                                 | (0.0%)     | 0                                         | (0.0%)     | 0                                      | (0.0%)     |
| Strange smell <sup>h</sup>                   | 1                            | (0.8%)     | 0                                   | (0.0%)     | 0                                 | (0.0%)     | 0                                 | (0.0%)     | 0                                         | (0.0%)     | 0                                      | (0.0%)     |
| Black spots <sup>i</sup>                     | 0                            | (0.0%)     | 2                                   | (0.8%)     | 0                                 | (0.0%)     | 0                                 | (0.0%)     | 0                                         | (0.0%)     | 0                                      | (0.0%)     |
| Irritated eyes <sup>i</sup>                  | 1                            | (0.8%)     | 4                                   | (1.5%)     | 2                                 | (1.5%)     | 0                                 | (0.0%)     | 1                                         | (2.0%)     | 3                                      | (5.3%)     |
| Irritated skin <sup>i</sup>                  | 1                            | (0.8%)     | 3                                   | (1.2%)     | 1                                 | (0.8%)     | 0                                 | (0.0%)     | 1                                         | (2.0%)     | 0                                      | (0.0%)     |
| Hot flashes <sup>i</sup>                     | 1                            | (0.8%)     | 5                                   | (1.9%)     | 0                                 | (0.0%)     | 0                                 | (0.0%)     | 4                                         | (8.2%)     | 0                                      | (0.0%)     |
| Earache <sup>i</sup>                         | 1                            | (0.8%)     | 1                                   | (0.4%)     | 1                                 | (0.8%)     | 0                                 | (0.0%)     | 1                                         | (2.0%)     | 0                                      | (0.0%)     |
| Palpitation <sup>i</sup>                     | 1                            | (0.8%)     | 3                                   | (1.2%)     | 0                                 | (0.0%)     | 0                                 | (0.0%)     | 1                                         | (2.0%)     | 1                                      | (1.8%)     |

$N_{\text{obs}}$  = number of observations

<sup>a</sup> Scanner category was missing for 14 of the 633 observations, resulting in 619 valid observations. One shift can satisfy more than one scanner category; therefore, the sum of observations exceeds the total number of 619 observations. Results are based on an unbalanced study sampling design with repeated measures per subject.

<sup>b</sup> Includes all large-bore cylindrical systems of 1.5 Tesla

<sup>c</sup> Includes all large-bore cylindrical systems of 3.0 Tesla

<sup>d</sup> Includes all large-bore cylindrical systems of 7.0 Tesla

<sup>e</sup> Includes extremity scanners, upright scanners and open (i.e. transversal field) scanners up to 1.5 Tesla and large-bore cylindrical systems below 1.5 Tesla

<sup>f</sup> Includes small-bore cylindrical animal scanners with field strengths between 4.7 and 11.7 Tesla

<sup>g</sup> SMF target core symptom, <sup>h</sup> SMF target symptom, <sup>i</sup> a priori unrelated symptom
