# Supplementary material for: Occupational exposure of healthcare and research staff to static magnetic stray fields from 1.5–7 Tesla MRI scanners is associated with reporting of transient symptoms
Source: PubMed Central journal article supplement — Occup Environ Med. 2014 Apr 8;71(6):423–9. doi: 10.1136/oemed-2013-101890 (PMC4033112; doi:10.1136/oemed-2013-101890), 2014-04-08
Supplement: oemed-2013-101890-s5.pdf [file oemed-2013-101890-s5.pdf]

eTable S3. Modal duration of SMF and SGF target symptoms<sup>a</sup>

| <b>Symptom</b>                      | <b>Number of forms on which duration was reported<sup>b</sup></b> | <b>Most reported duration<sup>c</sup></b> |
|-------------------------------------|-------------------------------------------------------------------|-------------------------------------------|
| Vertigo <sup>d</sup>                | 19                                                                | < 1 minute                                |
| Nausea <sup>d</sup>                 | 3                                                                 | 5-15 minutes                              |
| Head ringing <sup>d</sup>           | 3                                                                 | >60 minutes                               |
| Magnetophosphenes <sup>d</sup>      | 3                                                                 | < 1 minute                                |
| Metallic taste <sup>d</sup>         | 2                                                                 | < 1 minute and 1-5 minutes                |
| Headache <sup>e</sup>               | 39                                                                | 15-60 minutes                             |
| Tiredness <sup>e</sup>              | 37                                                                | 15-60 minutes                             |
| Concentration problems <sup>e</sup> | 13                                                                | 5-15 minutes                              |
| Vomiting <sup>e</sup>               | 0                                                                 | Symptom was not reported                  |
| Instability <sup>e</sup>            | 9                                                                 | < 1 minute                                |
| Lightheadedness <sup>e</sup>        | 20                                                                | < 1 minute                                |
| Blurred vision <sup>e</sup>         | 0                                                                 | No duration available                     |
| Strange smell <sup>e</sup>          | 1                                                                 | < 1 minute                                |
| Tingling <sup>f</sup>               | 0                                                                 | No duration available                     |
| Muscle contractions <sup>f</sup>    | 0                                                                 | Symptom was not reported                  |

<sup>a</sup> Duration was reported for only 33% of the reported symptoms.

<sup>b</sup> Information about symptom duration was collected on each single form that was completed. Approximately 70% of the diaries were filled in twice per day. These diaries consisted of 2 forms instead of 1.

<sup>c</sup> Duration is only included in this table for symptoms that were not yet present before start of the work shift. Response categories were 'less than 1 minute', '1-5 minutes', '5-15 minutes', '15-60 minutes' and 'longer than 60 minutes'.

<sup>d</sup> SMF target core symptom, <sup>e</sup> SMF target symptom, <sup>f</sup> SGF target symptom
